# Supplementary material
Source: Springer Nature journal article supplement (https://www.springermedizin.de/resource/supplementary/12960_2012_343_MOESM5_ESM.pdf/9569884)
Supplement: MOESM5 [file 9569884]

Without occupational flexibility  
(formally-trained nursing professionals)

FTEs in 2005:

- formally-trained and employed nursing professionals and
- formally-trained and unemployed nursing professionals

with the employment structure of 2005 in Germany / eastern Germany / western Germany.

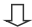

Future development according to occupational field „health care professionals without license to practice medicine”

With occupational flexibility  
(potential supply of workers for nursing professions)

-

Movers in other occupations

+

Movers from other occupations

X

Share of FTEs in ambulatory nursing care and (semi-) stationary nursing homes in 2005
